# Supplementary material for: Four novel Zn(ii)/Cu(ii) coordination polymers containing hydroxyl groups: synthesis, crystal structure, luminescence sensing and photocatalysis properties
Source: Royal Society of Chemistry journal article supplement (doi:10.1039/d0ce00950d), 2020-01-01

## Supporting Information

**Table S1** Selected bond distances /Å and bond angles /° for **1-4**.

| CP 1               |            |                    |            |
|--------------------|------------|--------------------|------------|
| Zn(1)-O(9)         | 1.9011(17) | Zn(1)-O(6)         | 1.9733(15) |
| Zn(1)-O(3C)        | 1.9795(15) | Zn(1)-N(3D)        | 2.0393(18) |
| Zn(2)-O(9)         | 1.9345(16) | Zn(2)-O(1B)        | 2.0033(15) |
| Zn(2)-N(4)         | 2.097(2)   | Zn(2)-N(5)         | 2.174(2)   |
| Zn(2)-O(5)         | 2.1858(16) |                    |            |
| O(9)-Zn(1)-O(3C)   | 122.08(7)  | O(9)-Zn(1)-O(6)    | 106.72(7)  |
| O(9)-Zn(1)-N(3D)   | 103.61(8)  | O(6)-Zn(1)-O(3C)   | 113.48(7)  |
| O(3C)-Zn(1)-N(3D)  | 98.63(7)   | O(6)-Zn(1)-N(3D)   | 111.40(7)  |
| O(9)-Zn(2)-N(4)    | 124.33(8)  | O(9)-Zn(2)-O(1)    | 111.09(7)  |
| O(9)-Zn(2)-N(5)    | 93.45(7)   | O(1B)-Zn(2)-N(4)   | 124.32(7)  |
| N(4)-Zn(2)-N(5)    | 77.81(8)   | O(1B)-Zn(2)-N(5)   | 95.05(7)   |
| O(1B)-Zn(2)-O(5)   | 95.84(7)   | O(9)-Zn(2)-O(5)    | 87.45(7)   |
| N(5)-Zn(2)-O(5)    | 167.94(7)  | N(4)-Zn(2)-O(5)    | 91.75(7)   |
| CP 2               |            |                    |            |
| Zn(1)-O(14)        | 1.942(3)   | Zn(1)-O(7F)        | 1.972(3)   |
| Zn(1)-O(10E)       | 1.975(3)   | Zn(1)-N(6)         | 2.016(3)   |
| Zn(2)-N(3)         | 2.032(3)   | Zn(2)-O(3B)        | 1.982(2)   |
| Zn(2)-O(5C)        | 1.986(3)   | Zn(2)-O(15)        | 1.923(3)   |
| Zn(3)-O(1)         | 1.956(3)   | Zn(3)-O(9E)        | 2.431(3)   |
| Zn(3)-O(13)        | 2.086(4)   | Zn(3)-O(14)        | 1.964(3)   |
| Zn(3)-N(8D)        | 2.041(3)   | Zn(4)-N(7)         | 2.028(3)   |
| Zn(4)-O(4B)        | 2.465      | Zn(4B)-O(15)       | 1.932(3)   |
| Zn(4)-O(16)        | 2.098(4)   | Zn(4)-O(11)        | 1.932(3)   |
| Zn(4)-N(7)         | 2.028(3)   |                    |            |
| O(14)-Zn(1)-O(7F)  | 112.28(12) | O(14)-Zn(1)-O(10E) | 112.50(12) |
| O(7F)-Zn(1)-O(10E) | 106.67(11) | O(14)-Zn(1)-N(6)   | 105.18(13) |
| O(7F)-Zn(1)-N(6)   | 103.95(12) | O(10E)-Zn(1)-N(6)  | 116.07(13) |
| O(15)-Zn(2)-O(3B)  | 113.41(12) | O(15)-Zn(2)-O(5C)  | 116.45(12) |
| O(3B)-Zn(2)-O(5C)  | 107.91(11) | O(15)-Zn(2)-N(3)   | 102.61(14) |
| O(3B)-Zn(2)-N(3)   | 112.96(13) | O(5C)-Zn(2)-N(3)   | 103.03(13) |
| O(1)-Zn(3)-O(14)   | 105.08(12) | O(1)-Zn(3)-N(8D)   | 143.03(13) |
| O(14)-Zn(3)-N(8D)  | 109.83(12) | O(1)-Zn(3)-N(13)   | 98.74(14)  |
| O(14)-Zn(3)-O(13)  | 95.80(13)  | N(8D)-Zn(3)-O(13)  | 89.60(15)  |
| O(1)-Zn(3)-O(9E)   | 89.37(12)  | O(14)-Zn(3)-O(9E)  | 84.24(11)  |

|                   |            |                   |            |
|-------------------|------------|-------------------|------------|
| N(8D)-Zn(3)-O(9E) | 82.47(12)  | O(13)-Zn(3)-O(9E) | 171.56(12) |
| O(15)-Zn(4)-O(11) | 110.90(13) | O(15)-Zn(4)-N(7)  | 110.57(13) |
| O(11)-Zn(4)-N(7)  | 135.03(13) | O(15)-Zn(4)-O(16) | 97.89(13)  |
| O(11)-Zn(4)-O(16) | 94.46(15)  | N(7)-Zn(4)-O(16)  | 96.40(16)  |
| O(15)-Zn(4)-O(4B) | 84.06(11)  | O(11)-Zn(4)-O(4B) | 86.10(12)  |
| N(7)-Zn(4)-O(4B)  | 81.60(13)  | O(16)-Zn(4)-O(4B) | 177.61(12) |

**CP 3**

|                   |            |                    |            |
|-------------------|------------|--------------------|------------|
| Cu(1)-O(7)        | 1.896(2)   | Cu(1)-O(1)         | 1.9745(17) |
| Cu(1)-O(5C)       | 1.9808(17) | Cu(1)-N(3)         | 2.041(2)   |
| Cu(2)-O(7)        | 1.9357(19) | Cu(2)-O(3B)        | 2.0029(17) |
| Cu(2)-N(4D)       | 2.099(2)   | Cu(2)-N(5)         | 2.173(2)   |
| Cu(2)-O(2)        | 2.1848(18) |                    |            |
| O(7)-Cu(1)-O(1)   | 106.69(8)  | O(7)- Cu(1)-O(5C)  | 122.00(8)  |
| O(1)- Cu(1)-O(5C) | 113.47(8)  | O(7)- Cu(1)-N(3D)  | 103.61(9)  |
| O(1)- Cu(1)-N(3D) | 111.36(8)  | O(5C)- Cu(1)-N(3D) | 98.81(8)   |
| O(7)- Cu(2)-O(3B) | 111.08(8)  | O(7)- Cu(2)-N(4)   | 124.36(9)  |
| O(3B)- Cu(2)-N(4) | 124.31(8)  | O(7)- Cu(2)-N(5)   | 93.54(9)   |
| O(3B)- Cu(2)-N(5) | 94.99(8)   | N(4)- Cu(2)-N(5)   | 77.85(9)   |
| O(7)- Cu(2)-O(2)  | 87.43(8)   | O(3B)- Cu(2)-O(2)  | 95.97(7)   |
| N(4)-Cu(2)-O(2)   | 91.59(8)   | N(5)- Cu(2)-O(2)   | 167.84(8)  |

**CP 4**

|                   |            |                   |            |
|-------------------|------------|-------------------|------------|
| Cu(1)-O(3D)       | 2.176(4)   | Cu(1)-O(2)        | 1.986(4)   |
| Cu(1)-O(4)        | 1.905(3)   | Cu(1)-N(5)        | 2.062(5)   |
| Cu(1)-N(4)        | 2.016(6)   |                   |            |
| O(2)- Cu(1)-O(3D) | 101.07(18) | O(27)- Cu(1)-N(5) | 155.48(19) |
| O(2)- Cu(1)-N(4)  | 91.2(2)    | O(4)- Cu(1)-O(3D) | 94.79(19)  |
| O(4)- Cu(1)-O(2)  | 92.57(15)  | O(4)- Cu(1)-N(5)  | 94.12(17)  |
| O(4)- Cu(1)-N(4)  | 174.89(19) | N(5)- Cu(1)-O(3D) | 101.84(19) |
| O(3D)- Cu(1)-N(4) | 87.9(2)    | N(4)- Cu(1)-N(5)  | 81.0(2)    |

Symmetric codes: A: -x, -y, -z; B: 1+x, y, z; C: x, -1+y, z; D: 1-x, 1-y, 1-z; for **1**; A : -x, -y, -z; B: 2-x, 2-y, -z; C: 1-x, 2-y, -z; D: x, 1+y, 1+z; E: 2-x, 2-y, 1-z; F: 3-x, 2-y, 1-z for **2**; A: -x, -y, -z ; B: -1+x, y, z; C: x, 1+y, z; D: 1-x, 1-y, 1-z for **3**; A: -x, -y, -z ; B:-x, y, -z+1/2 ; C: x+1/2, y+1/2, z; D: -x+1/2, y+1/2, -z+1/2 for **4**.

**Table S2** Hydrogen bond distances (Å) and bond angles (°) for **2**

| <i>D-H...A</i> | <i>d(D...A)</i> | <i>&lt;(DHA)</i> |
|----------------|-----------------|------------------|
| O18-H18B...O23 | 2.751(2)        | 122(2)           |
| O16-H16A...O18 | 2.743(2)        | 152(2)           |
| O16-H16B...O23 | 2.792(2)        | 170(2)           |
| O23-H23A...O22 | 2.906(2)        | 158(3)           |
| O17-H17B...O19 | 2.666(2)        | 178(3)           |
| O17-H17A...O2  | 2.733(2)        | 172(2)           |
| O22-H22B...O17 | 2.978(2)        | 177(2)           |
| O13-H13B...O17 | 2.722(2)        | 162(3)           |
| O22-H22A...O6  | 2.754(2)        | 168(3)           |
| O23-H23A...O24 | 2.804(2)        | 163(3)           |
| O24-H24A...O23 | 2.963(2)        | 120(2)           |
| O20-H20A...O19 | 2.703(2)        | 135(2)           |
| O20-H20B...O3  | 2.935(2)        | 119(2)           |

**Fig. S1** View of the 3D supramolecular architecture based on  $\pi \cdots \pi$  stacking interactions along  $a$ -axis.

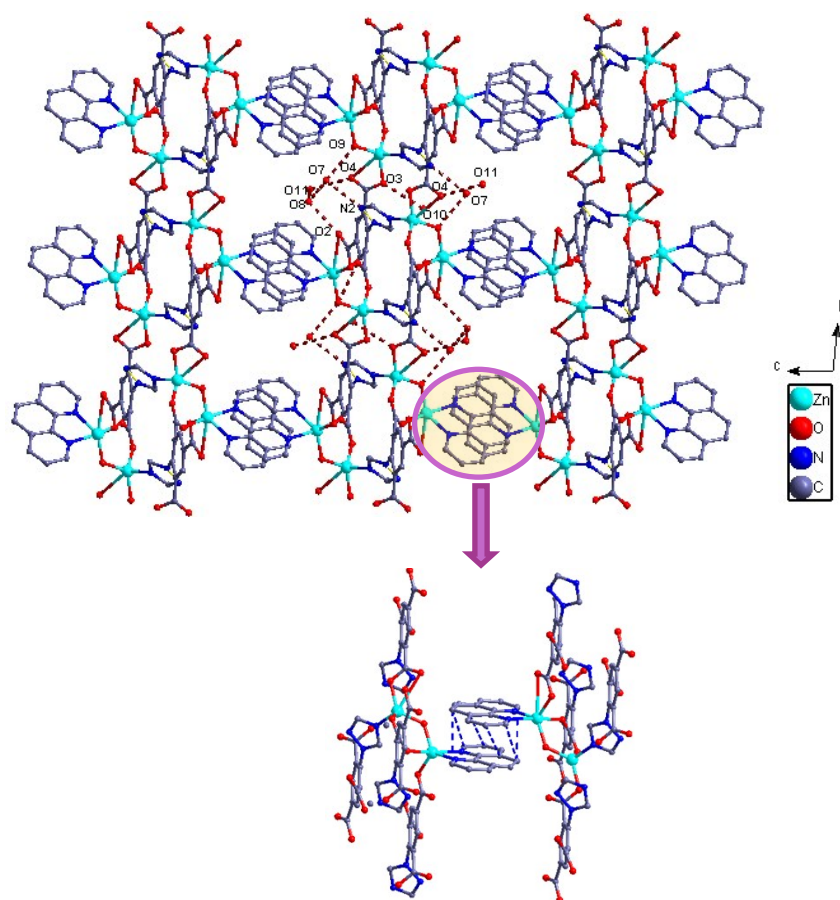

**Fig. S2** (a) View of water clusters based on hydrogen bonding interactions in 3D network along *c*-axis. (b) View of topological structure of 3D network.

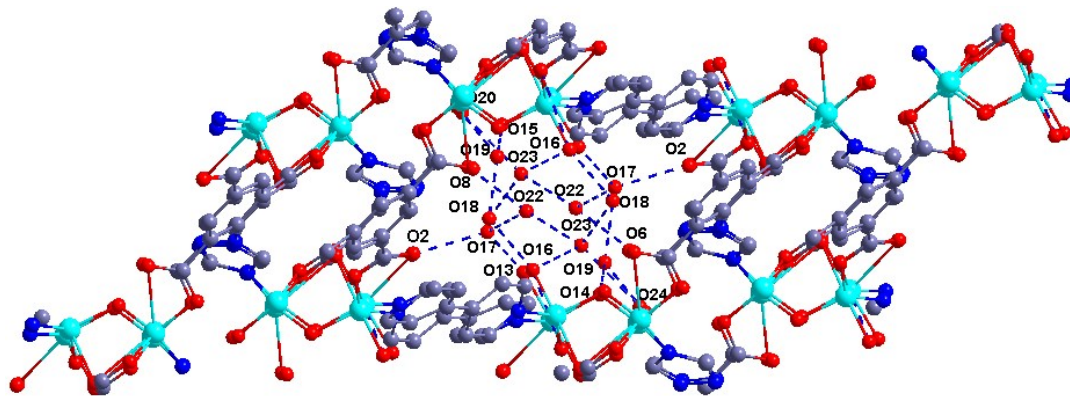

(a)

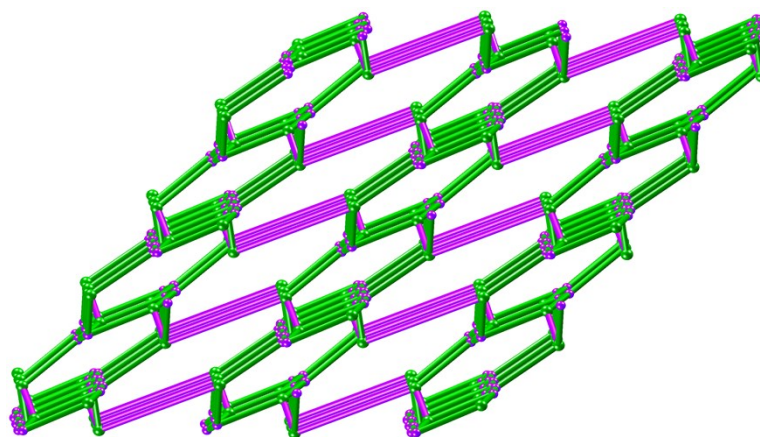

(b)

**Fig. S3.** TGA curves of CPs 1-4.

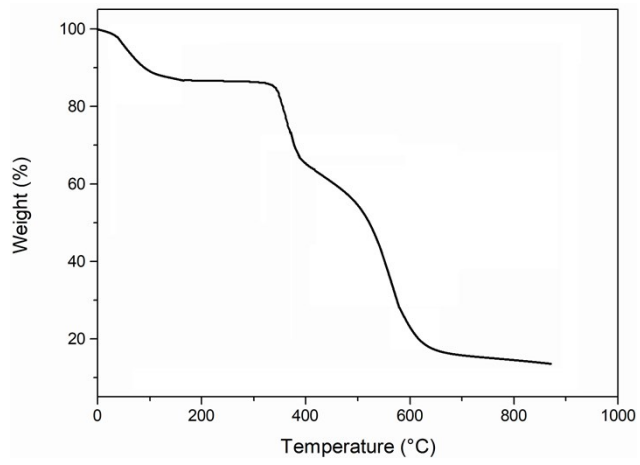

(a)

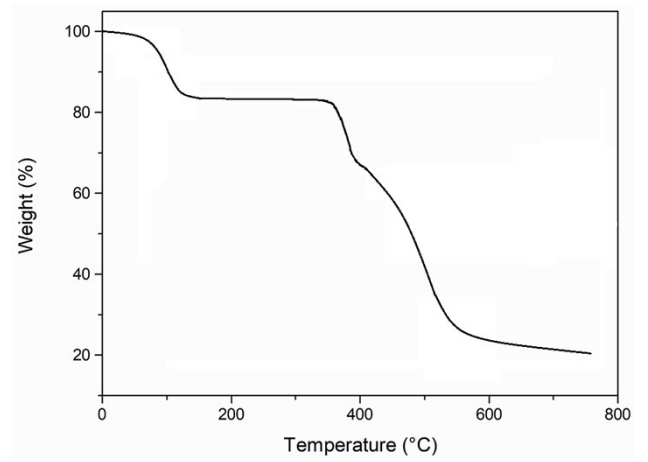

(b)

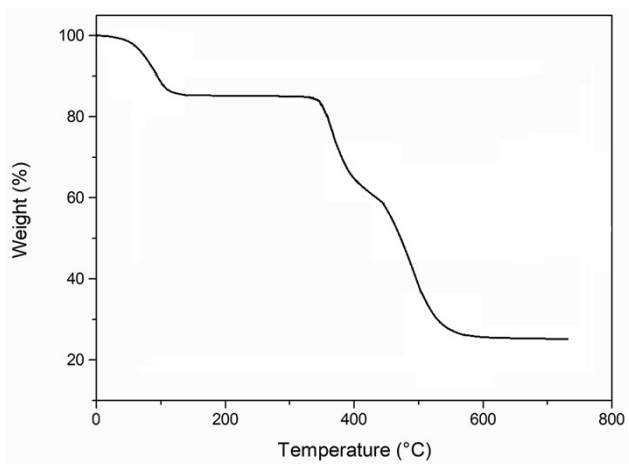

(c)

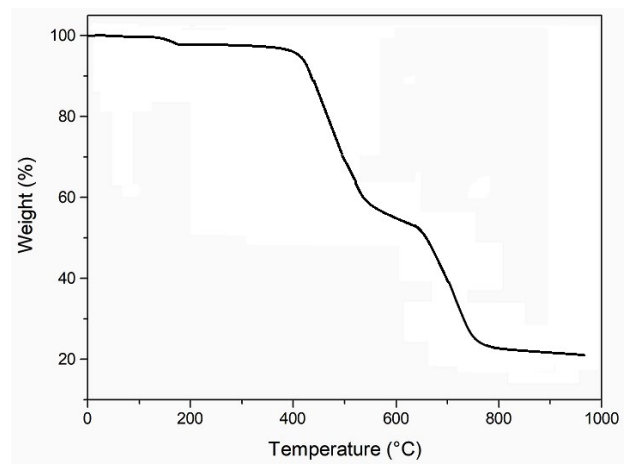

(d)

**Fig. S4.** PXRD patterns of CPs 1-4.

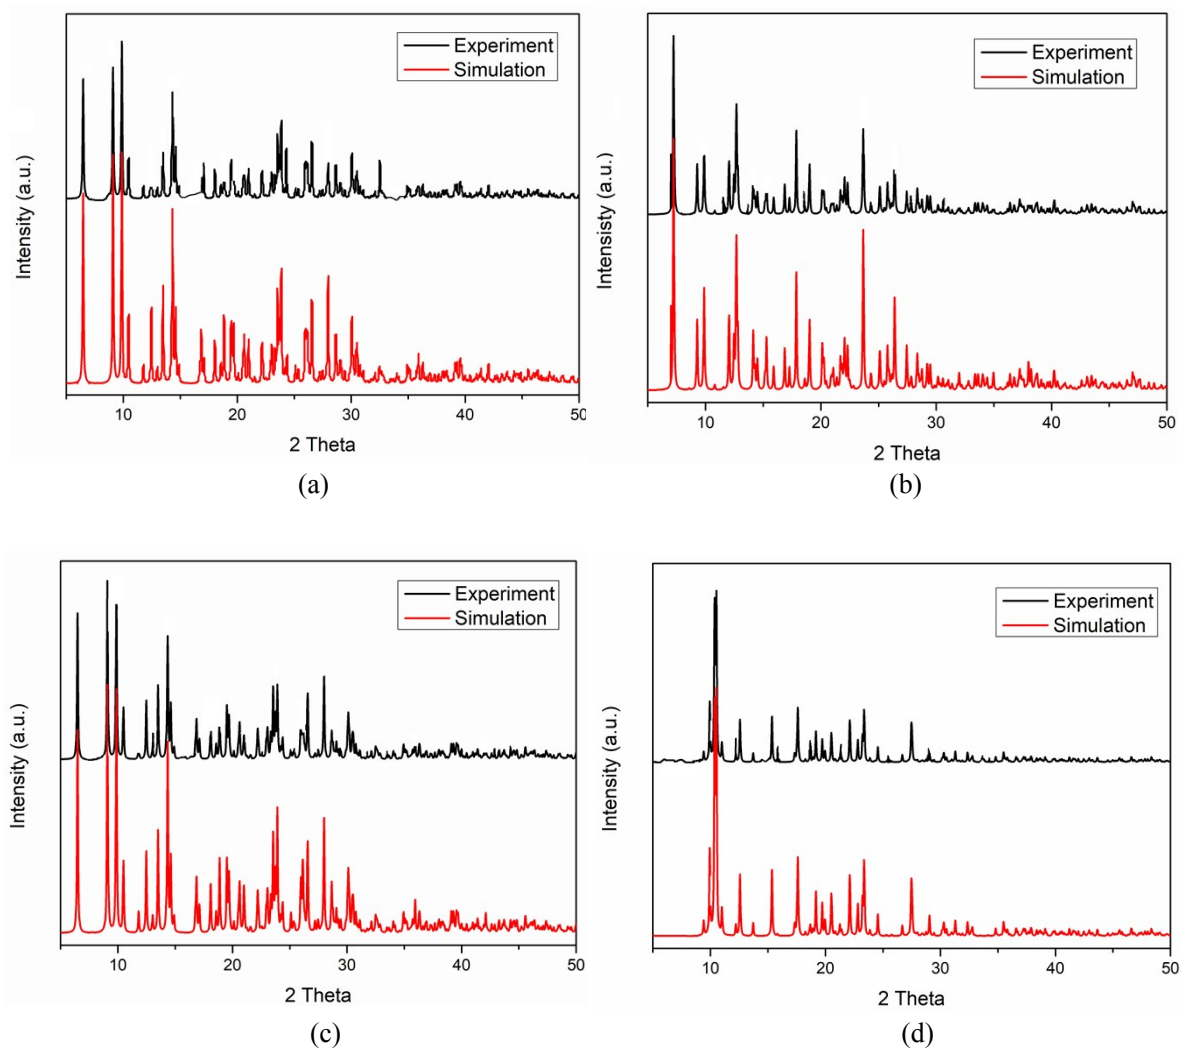

**Fig. S5** Emission intensities of **1** dispersed in the aqueous solution of  $\text{Cu}^{2+}$  in the presence of different ions.

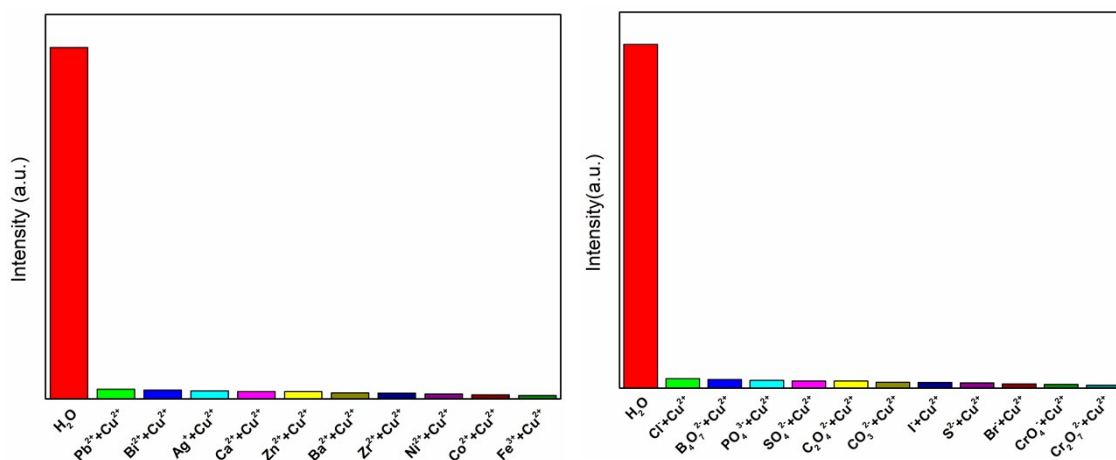

**Fig. S6** (a) linear plot of  $I_0/I-1$  and low  $\text{Cu}^{2+}$  concentration. (b) linear plot of  $I_0/I-1$  and low  $\text{Cr}_2\text{O}_7^{2-}$  concentration.

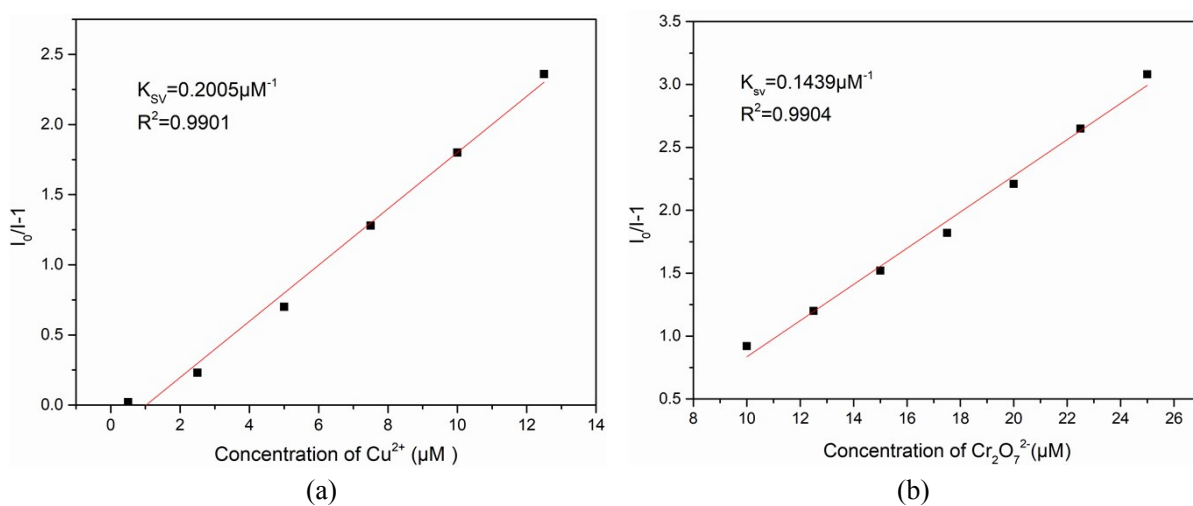

**Fig. S7** Emission intensities of **1** dispersed in the aqueous solution of  $\text{Cr}_2\text{O}_7^{2-}$  in the presence of different ions.

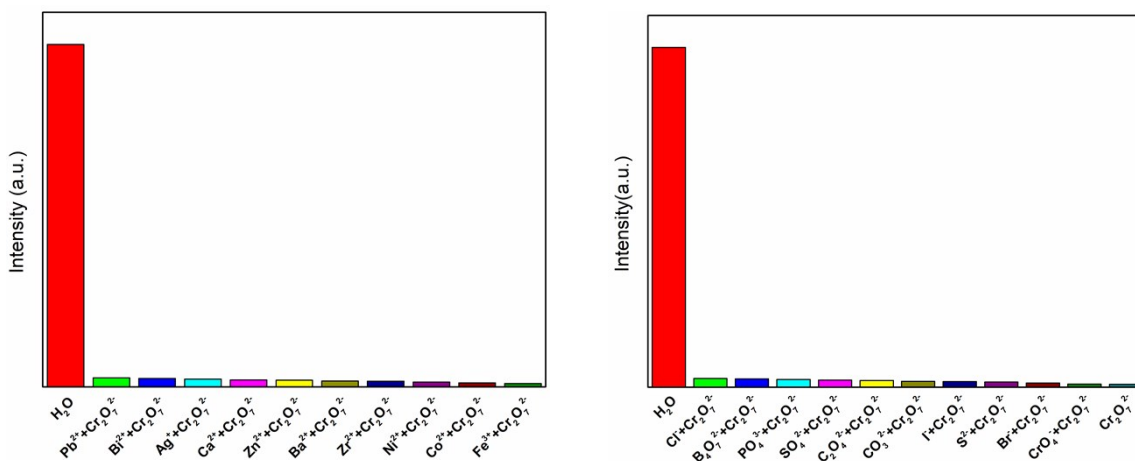



**Fig. S8** The UV-vis spectra (a: metal ions; b: anions; insert section: the excitation spectra of 1).

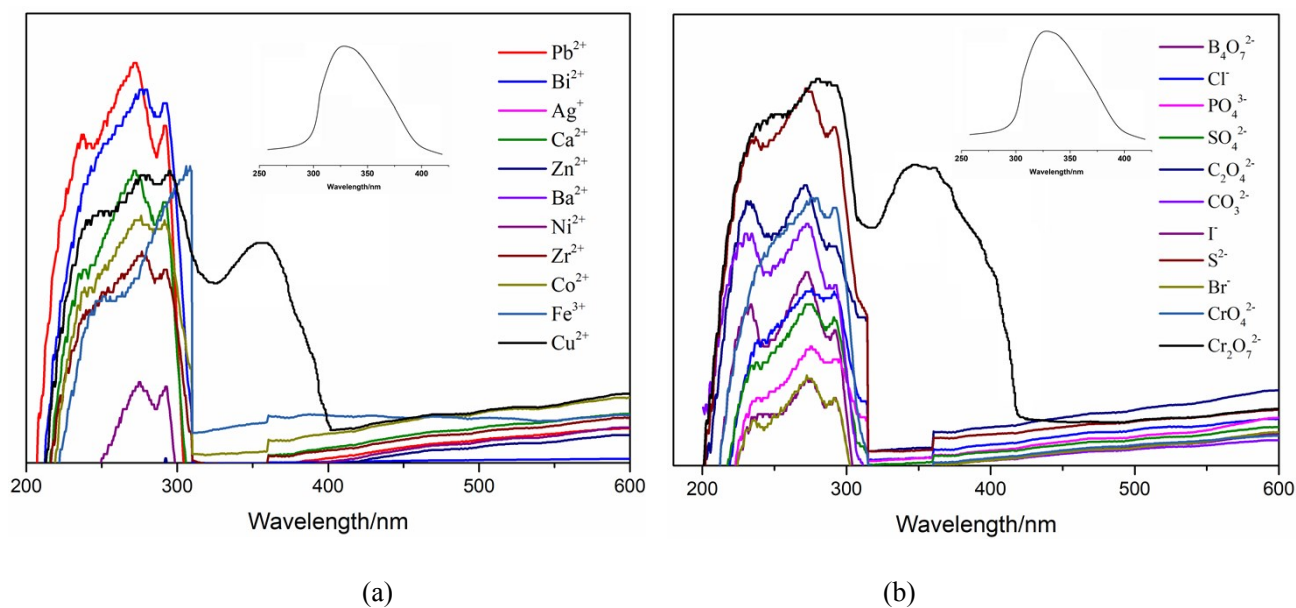

**Fig. S9** The luminescence intensity of 1 after sensing experiments (a:  $\text{Cu}^{2+}$ ; b:  $\text{Cr}_2\text{O}_7^{2-}$ ) four runs of recycling.

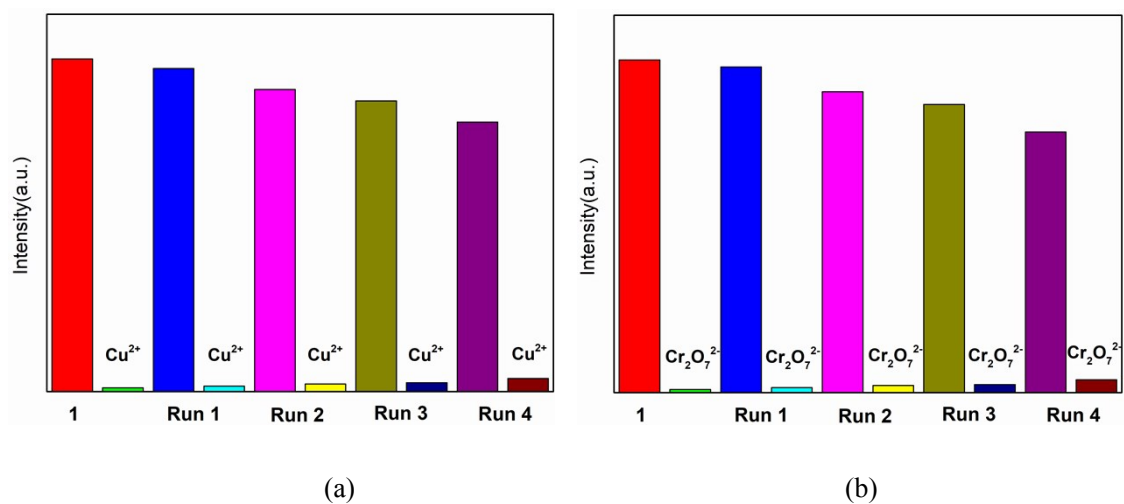

**Fig. S10** The PXRD patterns (a: 1 after sensing  $\text{Cu}^{2+}$  for four cycles in  $\text{H}_2\text{O}$ ; b: 1 after sensing  $\text{Cr}_2\text{O}_7^{2-}$ )

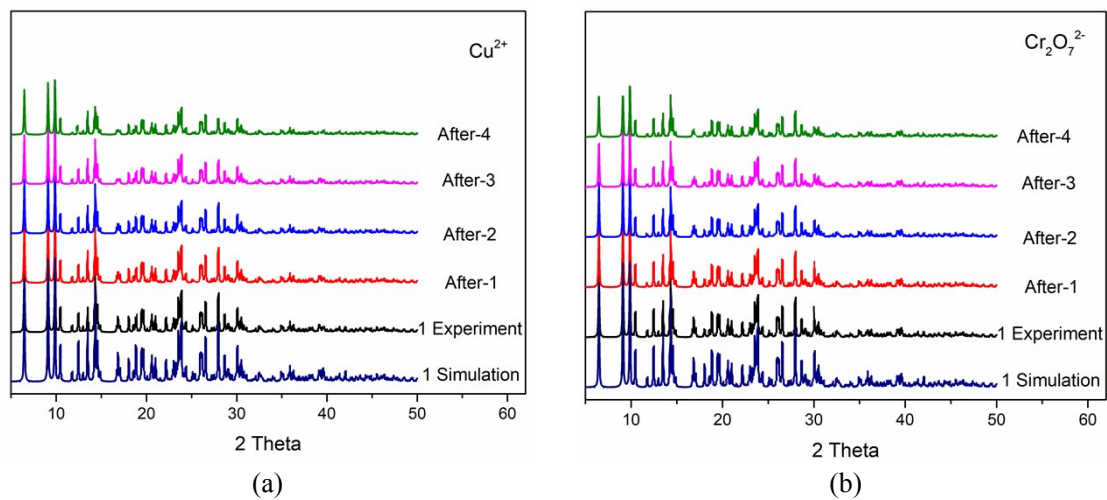

**Fig. S11.** UV-vis diffuse-reflectance spectra of CPs **3-4** with  $\text{BaSO}_4$  as background.

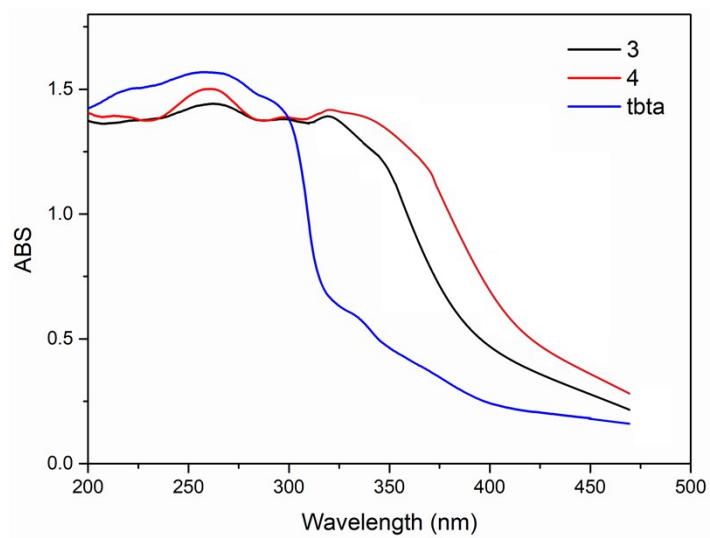

**Fig. S12.** Kubelka Munk-transformed diffuse reflectance spectra of 3(a) and 4(b).

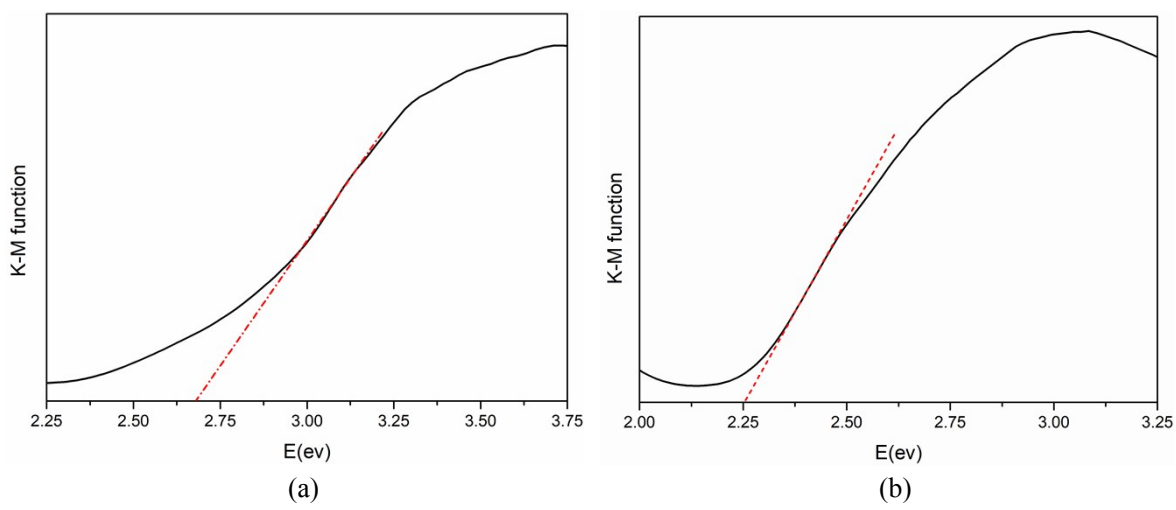

Supplement: d0ce00950d5.pdf [file d0ce00950d5.pdf]
